# Supplementary material
Source: PubMed Central journal article supplement (PMC4091266)
Supplement: ja502837t_si_001.pdf [file ja502837t_si_001.pdf]

## Supporting Information

# Molecular Recognition of Methyl $\alpha$ -D-Mannopyranoside by Antifreeze (Glyco)Proteins

Sen Wang,<sup>\*,†</sup> Xin Wen,<sup>\*,‡</sup> Arthur L. DeVries,<sup>¶</sup> Yelena Bagdagulyan,<sup>‡</sup> Alexander Morita,<sup>‡</sup> James A. Golen,<sup>§</sup> John G. Duman,<sup>#</sup> and Arnold L. Rheingold<sup>§</sup>

<sup>†</sup>Molecular Imaging Program, Stanford University, Stanford 94305, United States

<sup>‡</sup>Department of Chemistry and Biochemistry, California State University Los Angeles, Los Angeles 90032, United States

<sup>¶</sup> Department of Animal Biology, University of Illinois at Urbana-Champaign, Urbana, IL 61801, United States

<sup>§</sup> Department of Chemistry and Biochemistry, University of California, San Diego, La Jolla, CA 92093, United States

<sup>#</sup> Department of Biological Sciences, University of Notre Dame, Notre Dame, IN 46556, United States

## Table of Contents

|                 |    |
|-----------------|----|
| Figure S1 ..... | S2 |
| Figure S2 ..... | S2 |
| Figure S3 ..... | S3 |
| Figure S4 ..... | S3 |
| Figure S5 ..... | S4 |
| Figure S6 ..... | S4 |
| Table S1 .....  | S5 |

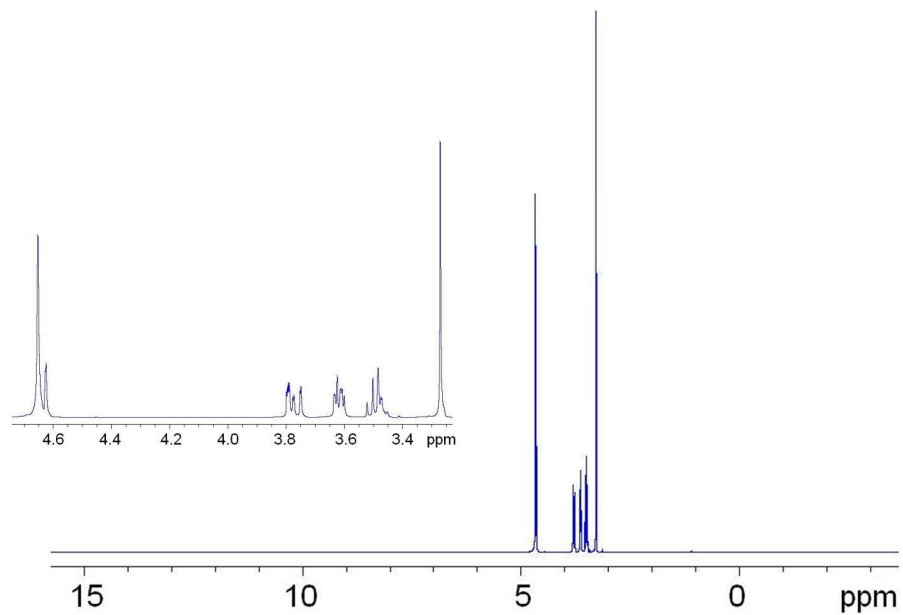

Figure S1.  $^1\text{H}$  NMR spectrum of MDM in  $\text{D}_2\text{O}$  (500 MHz).

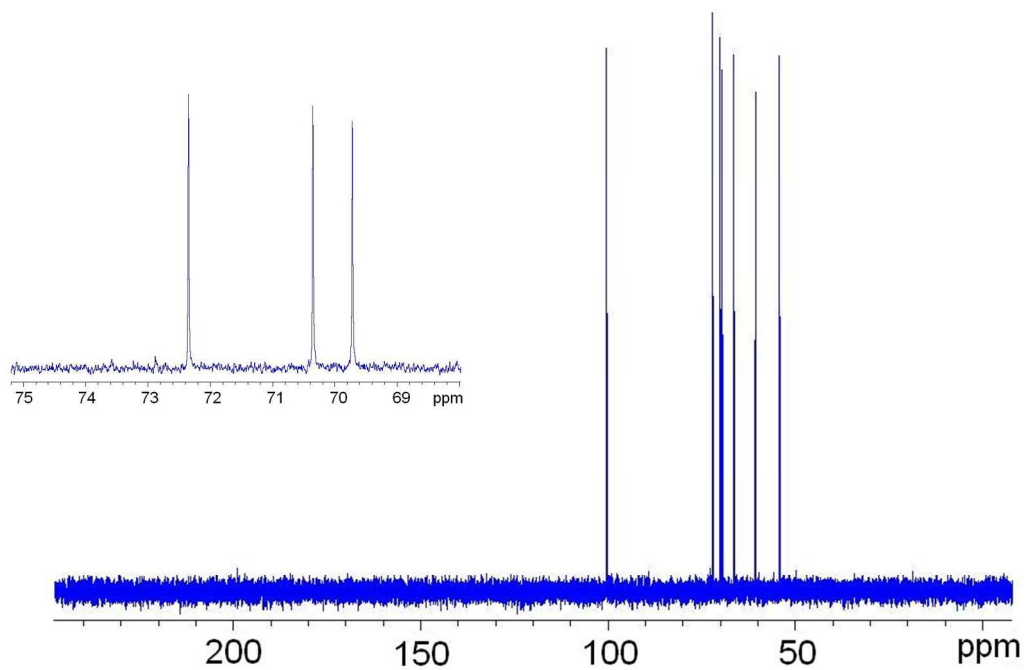

Figure S2.  $^{13}\text{C}$  NMR spectrum of MDM in  $\text{D}_2\text{O}$  (125.8 MHz).

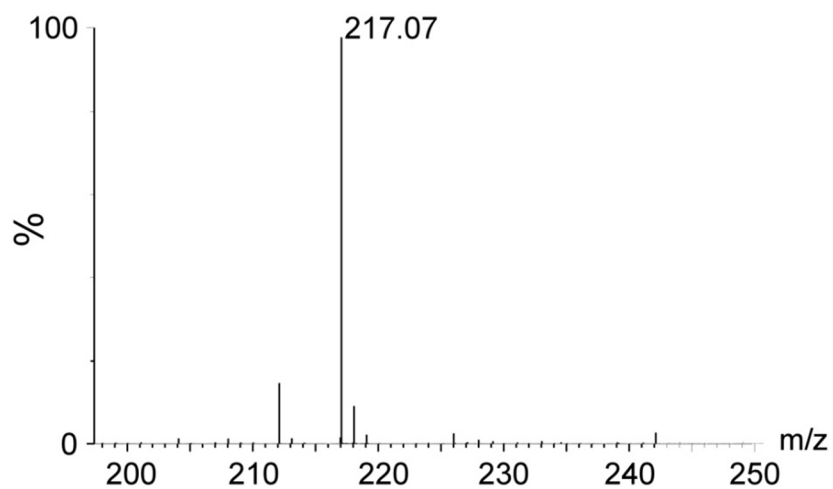

Figure S3. LC-MS spectrum of MDM. Calculated mass for  $C_7H_{14}O_6Na$  is 217.07 and observed mass is 217.07.

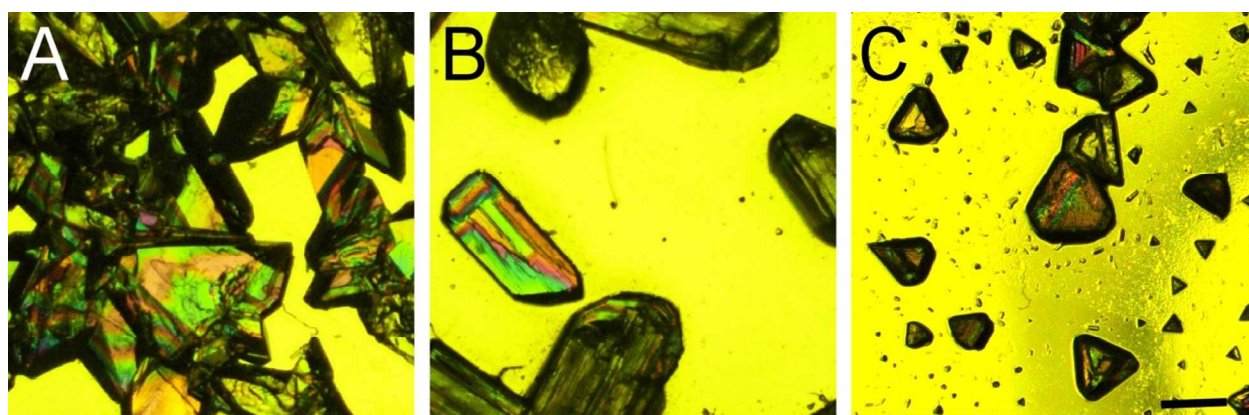

Figure S4. Optical micrographs of the MDM crystals obtained in the presence of the seed MDM crystals and (A) AFGP8, (B) AFGP1-5, and (C) DAFP1. The length of the scale bar, 1 mm, is the same in all the panels.

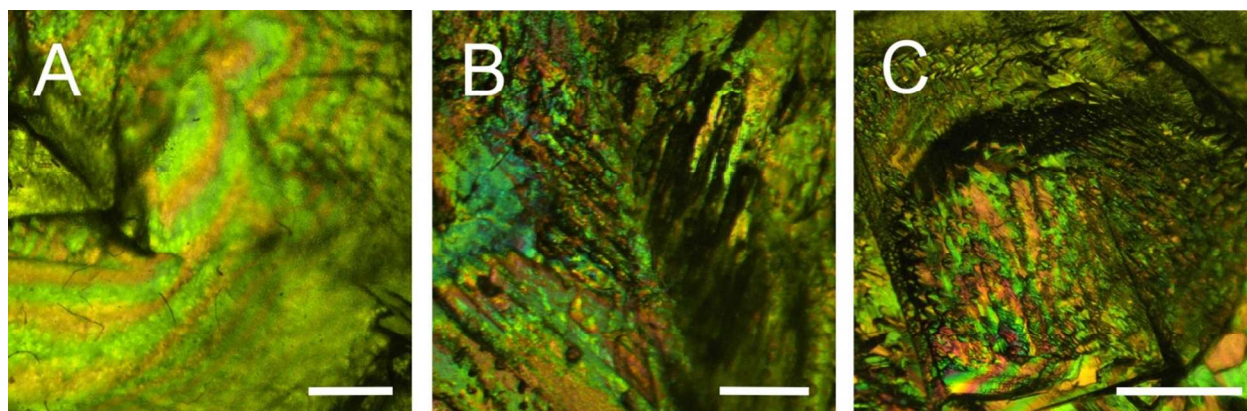

Figure S5. Optical micrographs of the MDM crystals obtained in the presence of the controls: (A) Gal1- $\beta$ -3GalNAc, (B) denatured DAFP1, (C) LCA. The length of the scale bar is 1 mm.

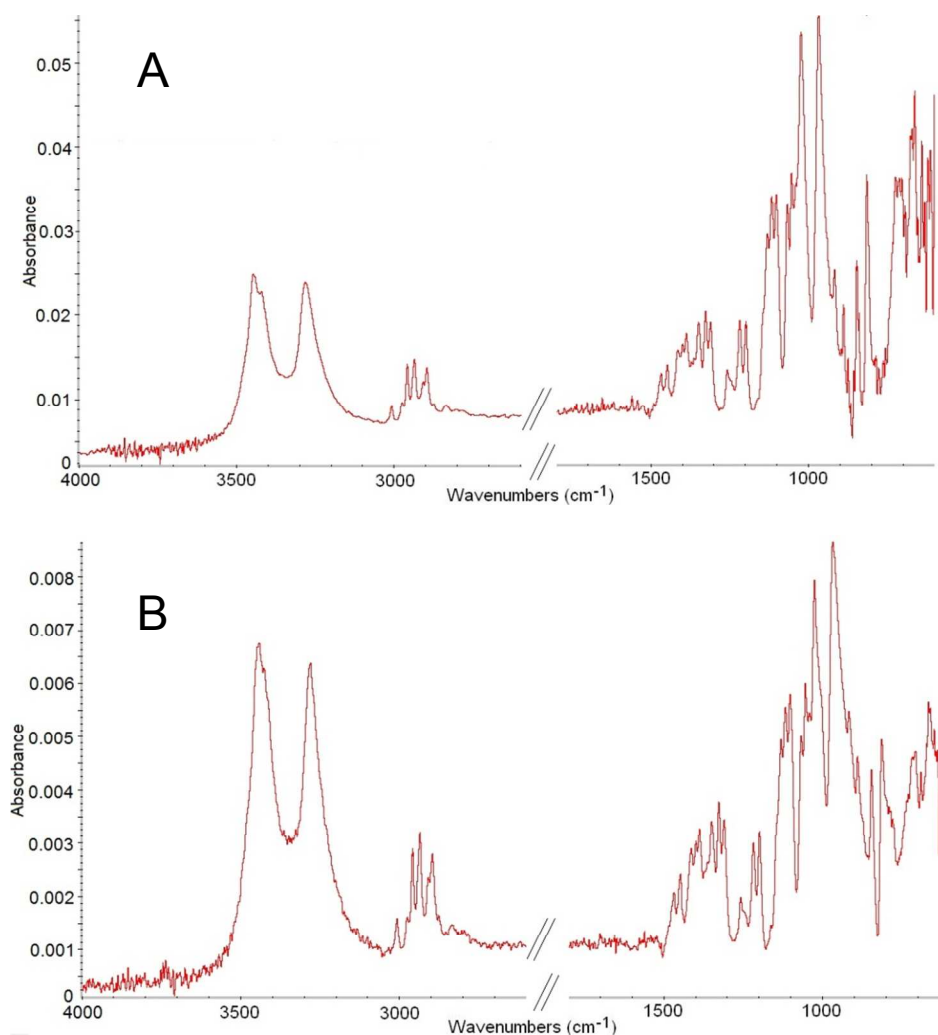

Figure S6. Representative ATR-FTIR spectra of the MDM crystals in the absence and presence of AF(G)Ps. The ATR-FTIR spectra of MDM crystals in the absence of AF(G)Ps (A) and in the presence of DAFP1 (B).

**Table S1. Sample results of methyl  $\alpha$ -D-mannopyranoside (MDM) crystal growth in the presence of additives.**

| Sample <sup>a</sup>          | Polypeptide concentration ( $\mu$ M) | Induction time (day) <sup>b</sup> | Complete time (day) <sup>b</sup> | Twin defects (%) <sup>c</sup> |
|------------------------------|--------------------------------------|-----------------------------------|----------------------------------|-------------------------------|
| MDM                          | 0                                    | 12                                | 14                               | > 75%                         |
| MDM/denatured DAFP1          | 170.0                                | 12                                | 14                               | > 75%                         |
| MDM + LCA                    | 275.4                                | 12                                | 14                               | > 75%                         |
| MDM + Gal1- $\beta$ -3GalNAc | 408.0                                | 12                                | 14                               | > 75%                         |
| MDM + DAFP1                  | 14.0                                 | 12                                | 17                               | < 5%                          |
| MDM + DAFP1                  | 0.15                                 | 12                                | 16                               | < 5%                          |
| MDM + AFGP1-5                | 1.89                                 | 12                                | 15                               | < 15%                         |
| MDM + AFGP1-5                | 1.00                                 | 12                                | 14.5                             | < 15%                         |
| MDM + AFGP8                  | 170.0                                | 12                                | 14                               | < 40%                         |
| MDM + AFGP8                  | 112.2                                | 12                                | 14                               | < 40%                         |

<sup>a</sup> Each sample contained 510 mM MDM on day 1. Results of each MDM alone and in the presence of each of the three control compounds, the denatured DAFP1, *Lens culinaris* lectin (LCA), and 2-acetamido-2-deoxy-O-( $\beta$ -D-galactopyranosyl)-D-galactose (Gal1- $\beta$ -3GalNAc) are listed for comparison. <sup>b</sup> The day the first solid was observed. Complete means no more weight loss from the vial. Time errors are less than 8 hours. <sup>c</sup> The identity and quality of single crystals were examined using polarized microscope and single crystal x-ray diffraction. The estimated percentages of crystals with twin defects are listed.
